# Supplementary material for: Alkane hydroxylase genes in psychrophile genomes and the potential for cold active catalysis
Source: PubMed Central journal article supplement (PMC4320567; doi:10.1186/1471-2164-15-1120), 2014-12-16

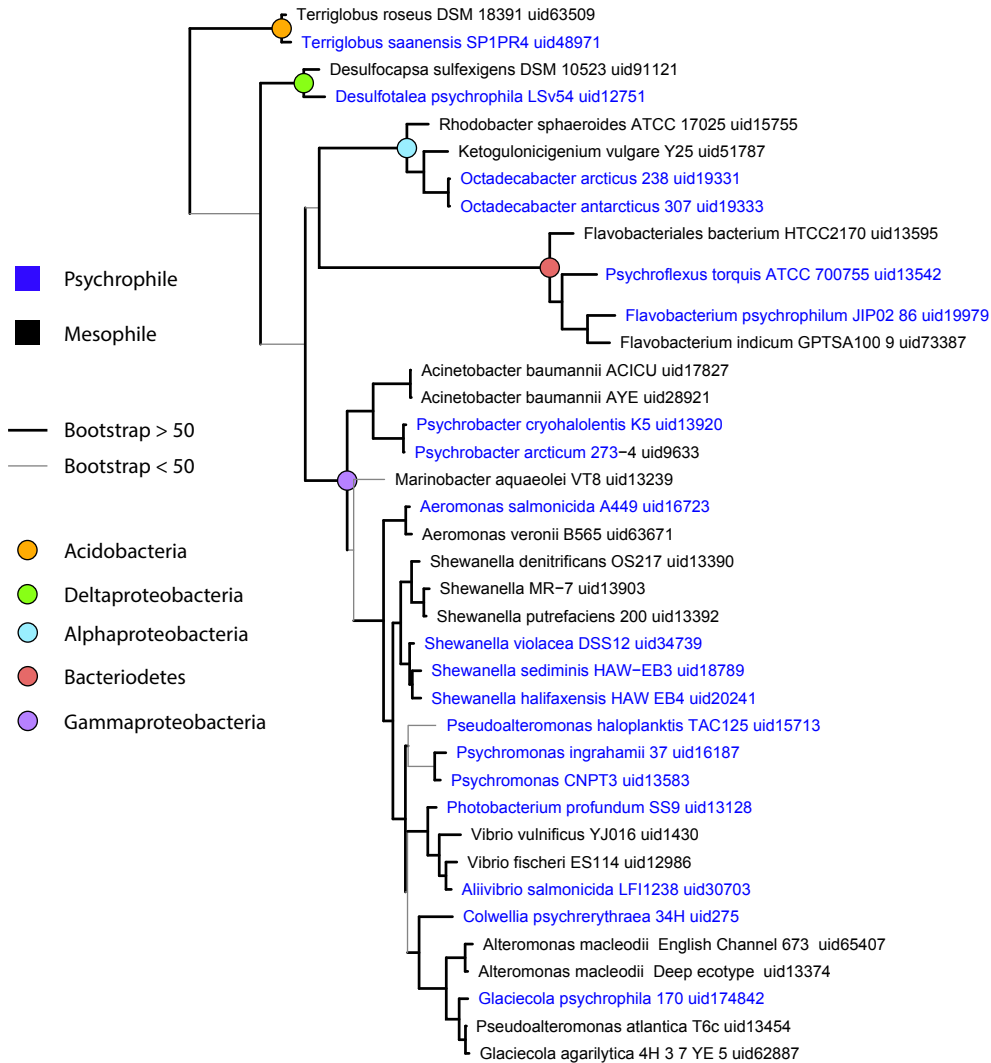

Supplement: 12864_2014_6905_MOESM1_ESM.pdf [file 12864_2014_6905_MOESM1_ESM.pdf]
